# Supplementary material for: Sensitivity of Arctic sulfate aerosol and clouds to changes in futuresurface seawater dimethylsulfide concentrations
Source: Copernicus journal article supplement (doi:10.5194/acp-2018-876), 2018-09-11
Supplement: Supplementary file 1 [file acp-2018-876-supplement.pdf]

Supplementary material for:

## **Sensitivity of Arctic sulfate aerosol and clouds to changes in future surface seawater dimethylsulfide concentrations**

Rashed Mahmood<sup>1,2</sup>, Knut von Salzen<sup>1,2</sup>, Ann-Lise Norman<sup>3</sup>, Martí Galí<sup>4</sup> and Maurice Levasseur<sup>5</sup>

<sup>1</sup>School of Earth and Ocean Sciences, University of Victoria, Victoria, British Columbia, Canada

<sup>2</sup>Canadian Center for Climate Modelling and Analysis, Environment and Climate Change Canada, Victoria, British Columbia, Canada

<sup>3</sup>Department of Physics and Astronomy, University of Calgary, Calgary, Alberta, Canada

<sup>4</sup>Takuvik Joint International Laboratory & Québec-Océan, Université Laval, Québec, Québec, Canada

<sup>5</sup>Département de biologie and Québec-Océan, Université Laval, Québec, Québec, Canada

| Table S1. Changes in Arctic sulfate emission, wet deposition, and precipitation (%)* |          |                |               |
|--------------------------------------------------------------------------------------|----------|----------------|---------------|
|                                                                                      | Emission | Wet deposition | Precipitation |
| CLIM                                                                                 | 33.34    | -40.60         | 14.43         |
| 10×CLIM                                                                              | 34.04    | -7.47          | 14.35         |
| UNFM                                                                                 | 53.19    | -9.00          | 14.31         |
| 10×SAT                                                                               | 47.40    | -15.07         | 14.29         |
| CNTRL                                                                                | 0        | -47.67         | 14.54         |

\* $100 \times (2050\text{Exp} - 2000\text{Exp}) / 2000\text{Exp}$ ;  
 where Exp represents (either of CLIM, 10×CLIM, UNFM, 10×SAT, CNTRL).

| Table S2. Future changes in Arctic mean wet deposition relative to present day wet deposition (%)* |       |
|----------------------------------------------------------------------------------------------------|-------|
| CLIM                                                                                               | 42.45 |
| 10×CLIM                                                                                            | 45.67 |
| UNFM                                                                                               | 72.10 |
| 10×SAT                                                                                             | 55.92 |

\* $100 \times \{ (2050\text{Exp} - 2050\text{CNTRL}) - (2000\text{Exp} - 2000\text{CNTRL}) \} / (2000\text{Exp} - 2000\text{CNTRL})$ ; where Exp represents (either of CLIM, 10×CLIM, UNFM, 10×SAT)

| Table S3. The fraction of Arctic DMS emissions that is removed by wet deposition (%)* |       |       |
|---------------------------------------------------------------------------------------|-------|-------|
|                                                                                       | 2000  | 2050  |
| CLIM                                                                                  | 76.52 | 81.75 |
| 10×CLIM                                                                               | 68.43 | 74.37 |
| UNFM                                                                                  | 55.31 | 62.13 |
| 10×SAT                                                                                | 76.55 | 80.97 |

\* $100 \times (\text{Exp:wetdep} - \text{CNTRL:wetdep}) / \text{Exp:emission}$ ; where Exp represents (either of CLIM, 10×CLIM, UNFM, 10×SAT) and wetdep is wet deposition

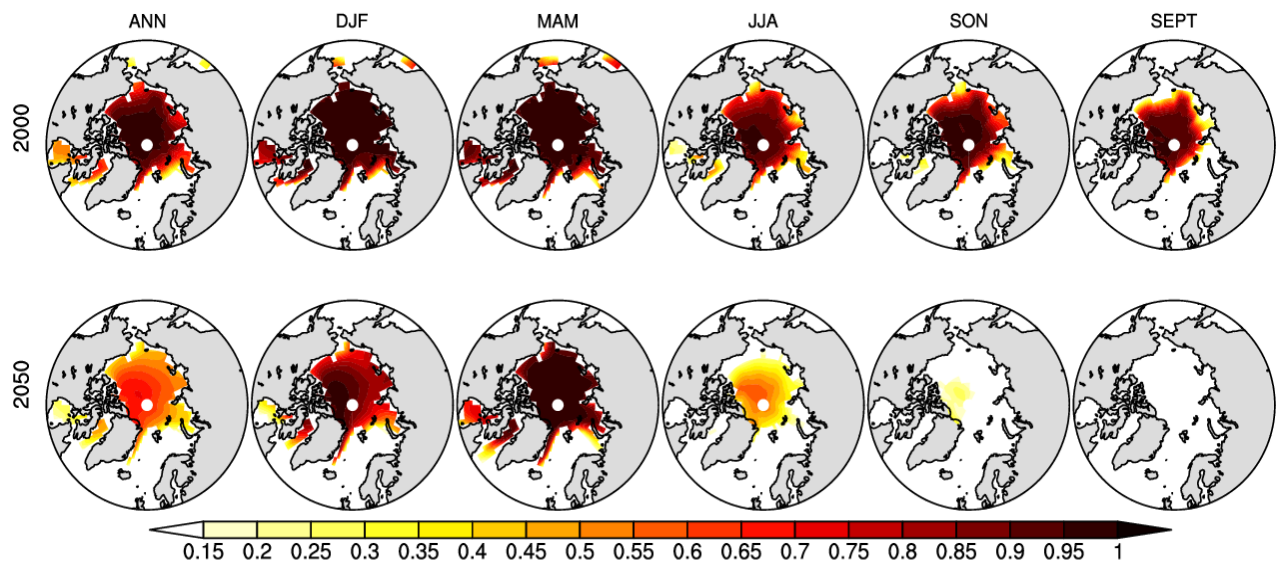

Figure S1: Fraction of sea ice in the Arctic for 2000 and 2050 simulations.

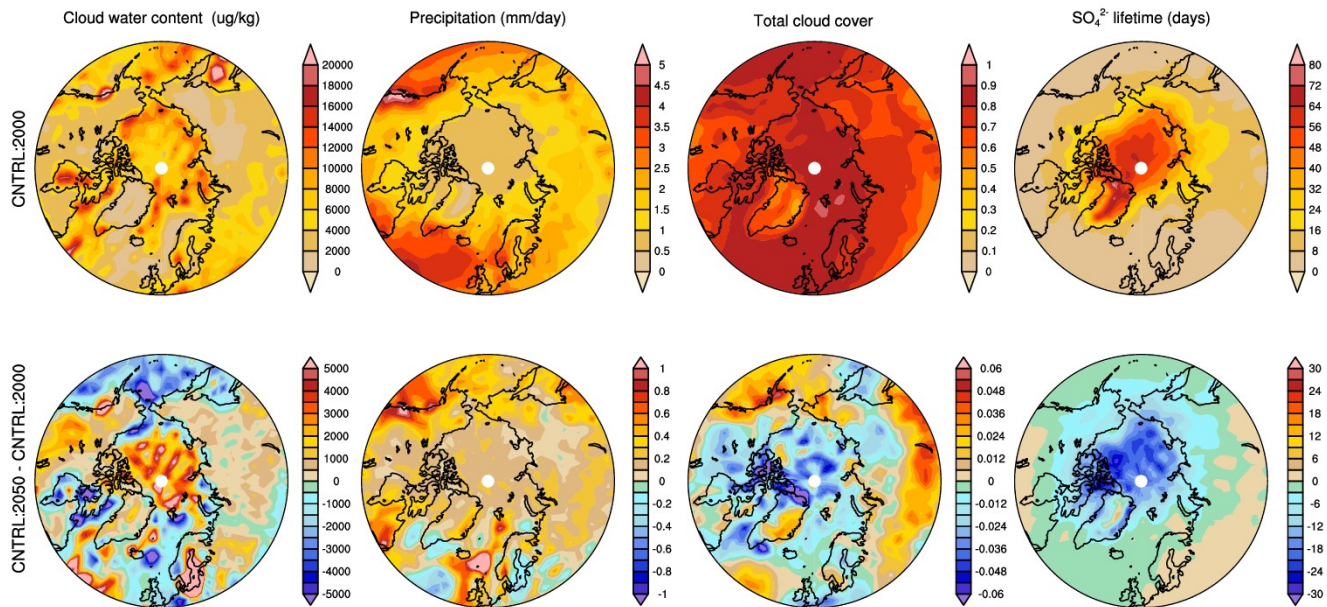

**Figure S2: Annual mean cloud water content in low clouds, precipitation, total cloud cover and sulfate lifetimes in CNTRL for year 2000 (top row). The bottom row represents net changes that occur due to aerosol, greenhouse gases, and sea ice changes between 2000 and 2050.**

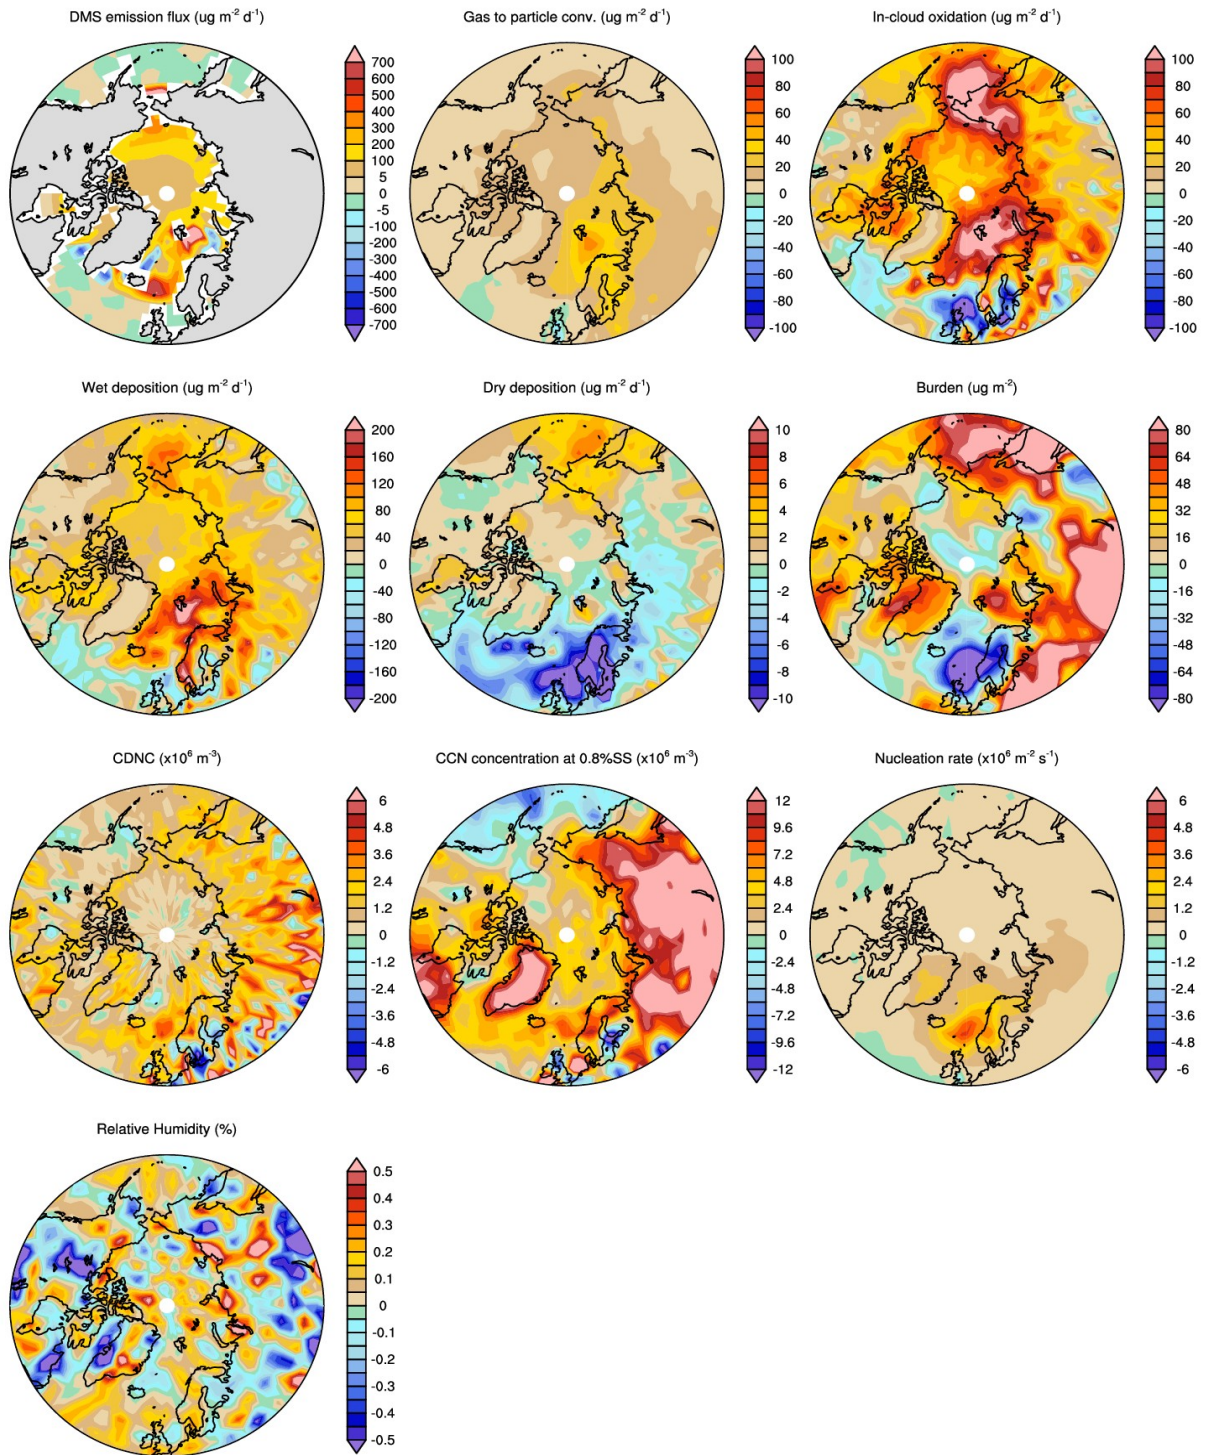

**Figure S3: Difference between 2050 and 2000 for 10x DMS: [(10x DMS:2050 – CNTRL:2050) – (10x DMS:2000–CNTRL:2000)]. CDNC and CCN concentrations are for the 1<sup>st</sup> model layer.**



Cloud radiative forcing ( $\text{W m}^{-2}$ ) CNTRL:2050 - CNTRL:2000

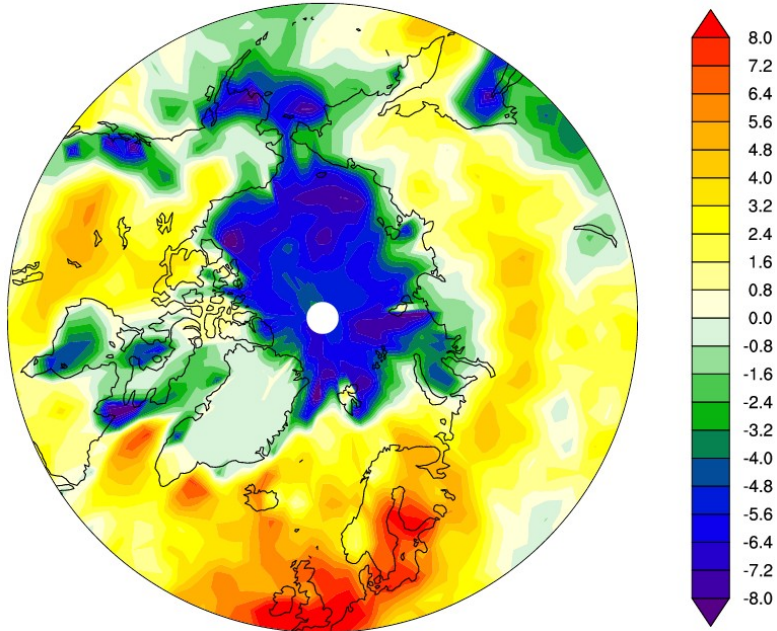

Figure S4: Annual mean cloud radiative forcing (2050-2000) for CNTRL.
